# Supplementary material for: IL-33/ST2 Axis Protects Against Traumatic Brain Injury Through Enhancing the Function of Regulatory T Cells
Source: PubMed Central journal article supplement (PMC9006950; doi:10.3389/fimmu.2022.860772), 2022-03-30
Supplement: DataSheet_1.pdf [file DataSheet_1.pdf]

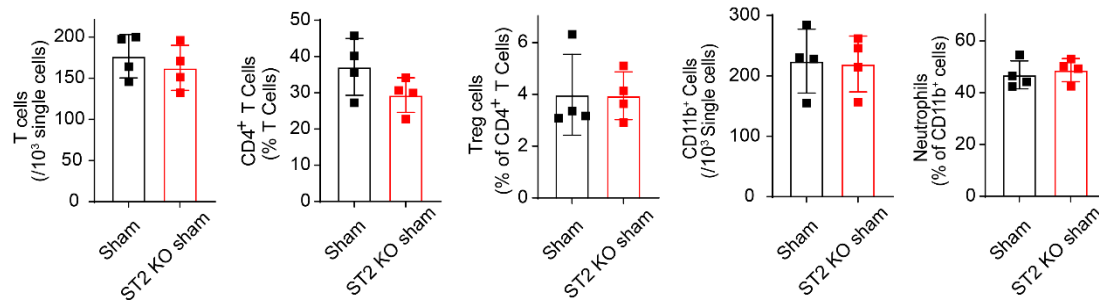

**Figure S1. Immune cell assessment in sham ST2 KO and sham WT mice.** Quantification of total CD3<sup>+</sup> T cells, CD4<sup>+</sup> T cells, CD4<sup>+</sup>CD25<sup>+</sup>Foxp3<sup>+</sup> Tregs, total CD11b<sup>+</sup> cells, and CD11b<sup>+</sup>Ly6G<sup>+</sup> neutrophils in blood. n=4.
